# Supplementary material for: Removal of Fluoride from Aqueous Solution Using Shrimp Shell Residue as a Biosorbent after Astaxanthin Recovery
Source: Molecules. 2023 May 5;28(9):3897. doi: 10.3390/molecules28093897 (PMC10180352; doi:10.3390/molecules28093897)
Supplement: Supplementary file 1 [file molecules-28-03897-s001.zip › molecules-2348462-supplementary.pdf]

## Supplementary material

### Figure Captions

**Figure S1.** Micrographs of shrimp shells before and after dissolving in [Emim]Ac with solid-liquid ratio of 1:20 g/g at 100°C for 2 h.

**Figure S2.** X-ray diffraction patterns for shrimp shells before and after astaxanthin recovery at different extraction conditions: (a) solid-solvent ratio at: size = 180-250  $\mu\text{m}$ ,  $T = 60\text{ }^{\circ}\text{C}$ , and  $t = 2\text{ h}$ ; (b) pretreatment time at: size = 180-250  $\mu\text{m}$ ,  $T = 60\text{ }^{\circ}\text{C}$ , and solid-solvent ratio = 1:10; (c) size of shrimp shells at: solid-solvent ratio = 1:10,  $T = 60\text{ }^{\circ}\text{C}$ , and  $t = 2\text{ h}$ ; (d) pretreatment temperature at: solid-solvent ratio = 1:10, size = 180-250  $\mu\text{m}$ , and  $t = 2\text{ h}$ .

### Table Captions

**Table S1.** The thermodynamic parameters for fluoride adsorption with ETSS.

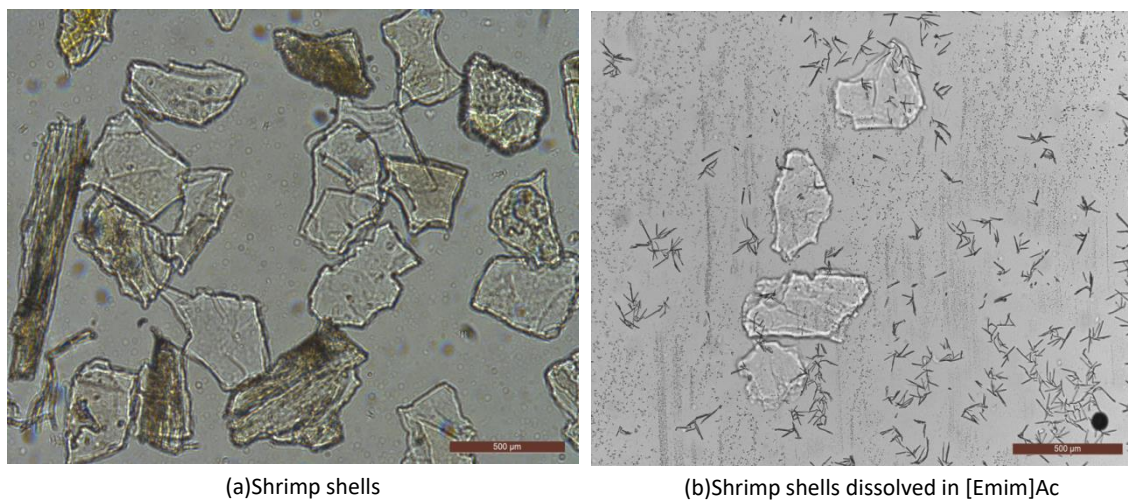

**Figure S1.**

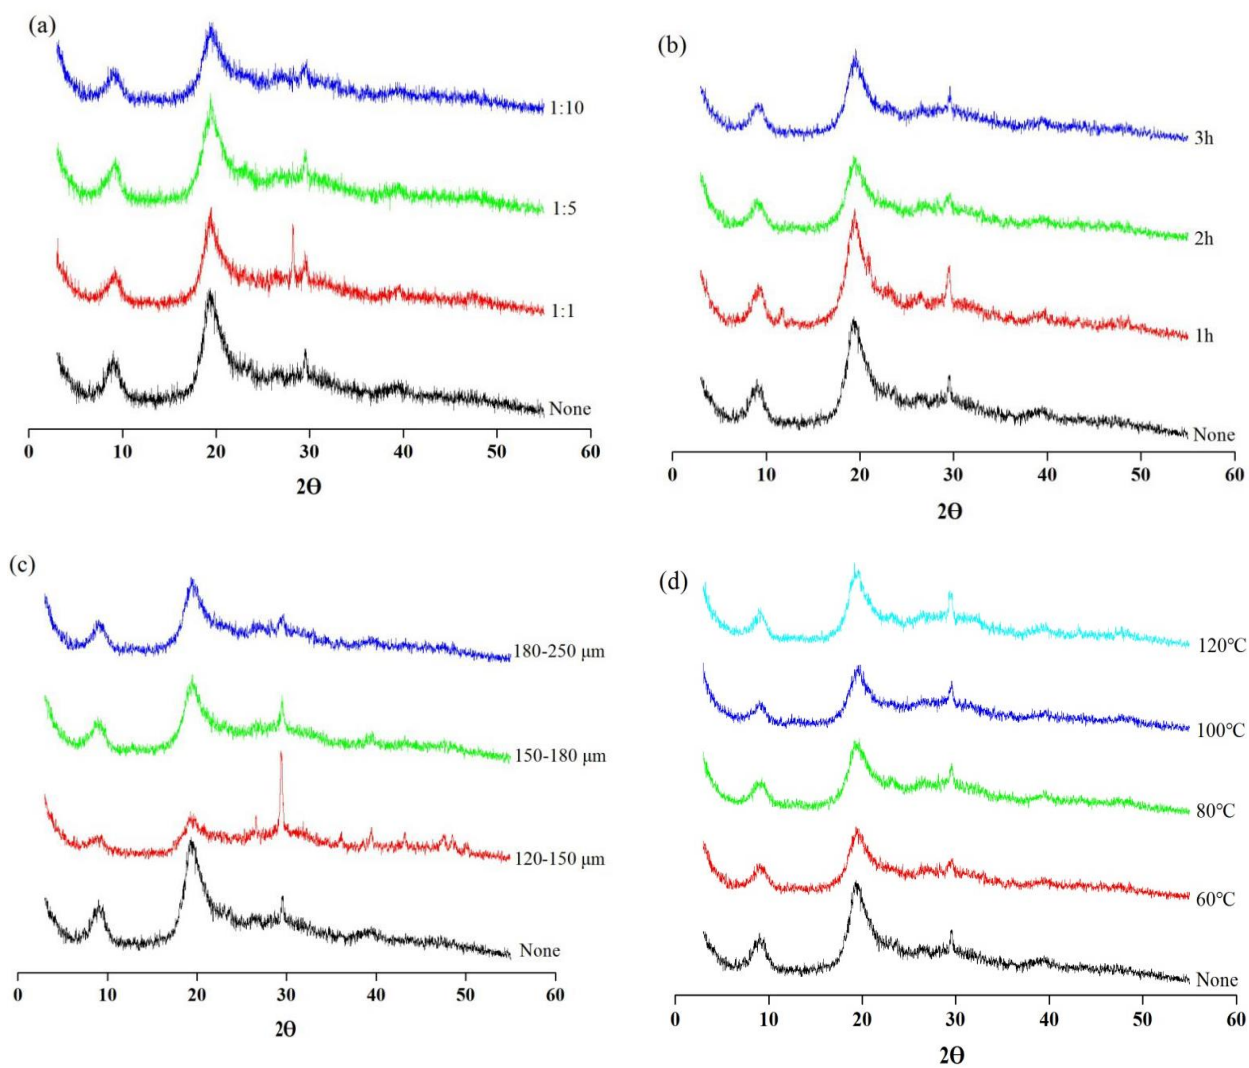

**Figure S2.**

**Table S1**The thermodynamic parameters for fluoride adsorption with ETSS<sup>a</sup>.

| Temperature (°C) | $\Delta G$ (kJ·mol <sup>-1</sup> ) | $\Delta H^0$ (kJ·mol <sup>-1</sup> ) | $\Delta S^0$ (kJ·mol <sup>-1</sup> ·K <sup>-1</sup> ) |
|------------------|------------------------------------|--------------------------------------|-------------------------------------------------------|
| 20               | 5.20                               | -                                    | -                                                     |
| 30               | 4.50                               | -                                    | -                                                     |
| 40               | 4.39                               | 9.58                                 | 0.02                                                  |
| 50               | 4.43                               | -                                    | -                                                     |
| 60               | 4.49                               | -                                    | -                                                     |

<sup>a</sup> adsorbent dose = 10 g/L,  $C_0$  = 50 mg/L, time = 8 h
